# Supplementary material for: A new phosphorene allotrope: the assembly of phosphorene nanoribbons and chains
Source: Royal Society of Chemistry journal article supplement (doi:10.1039/d2cp02172b), 2022-01-01
Supplement: d2cp02172b1.pdf [file d2cp02172b1.pdf]

## Supporting information

### **A new phosphorene allotrope: the assembly of phosphorene nanoribbons and chains**

Congling Dai,<sup>a</sup> Xinyong Cai,<sup>a</sup> Yuxiang Ni,<sup>a</sup> Yuanzheng Chen,<sup>a</sup> Hongyan Wang<sup>a,\*</sup>

*<sup>a</sup>School of Physical Science and Technology, Key Laboratory of Advanced Technology of Materials,  
Ministry of Education of China, Southwest Jiaotong University, Chengdu 610031, China*

Email: [hongyanw@swjtu.edu.cn](mailto:hongyanw@swjtu.edu.cn)

## Supporting Figure

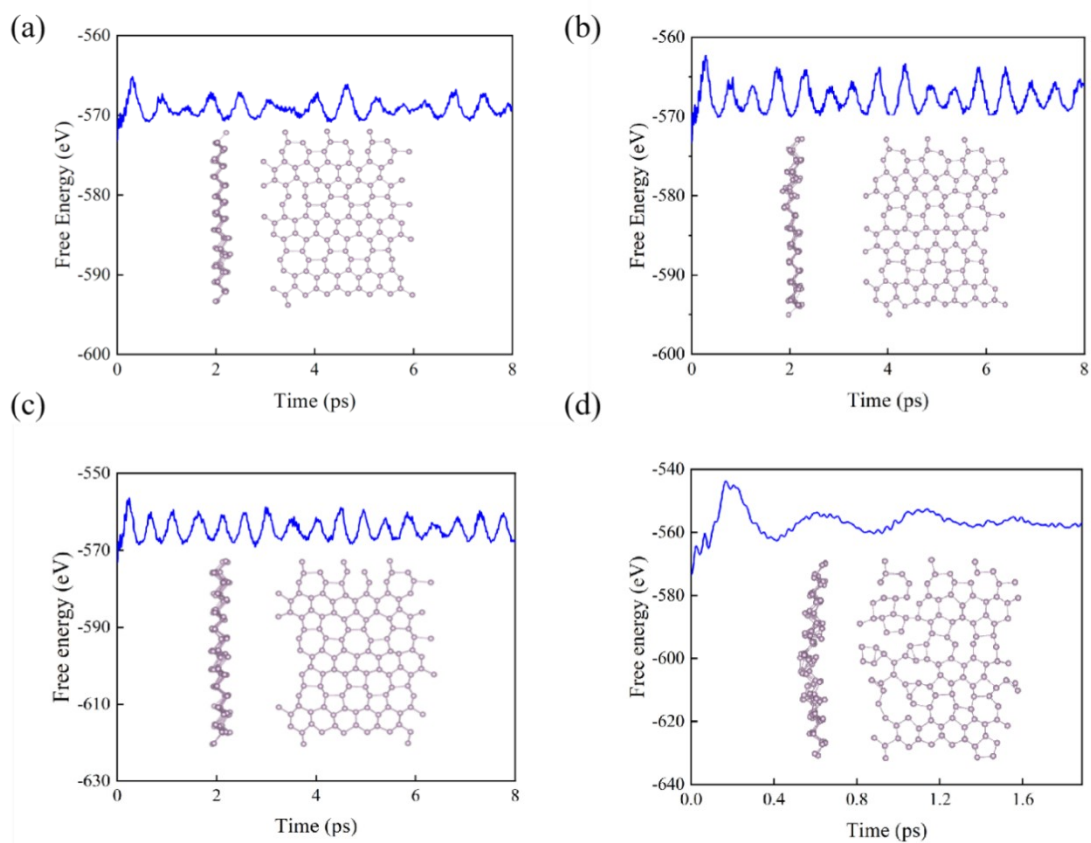

**Figure S1.** Snapshots of the final frame of the P<sub>567</sub> monolayer at (a) 300 K, (b) 400 K, (c) 600 K and (d) 1000 K of MD simulations.

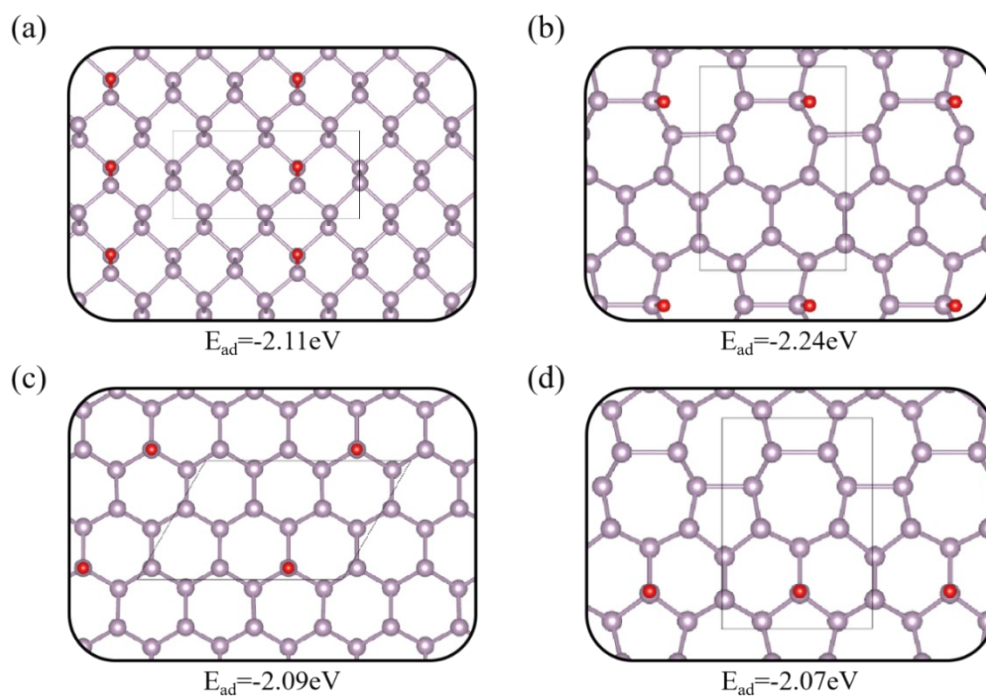

**Figure S2.** Single oxygen atom adsorption on (a) black phosphorene; (c) blue phosphorene; (b), (d) the  $P_{567}$ . The oxygen atoms are in red, and the phosphorus atoms are in purple.

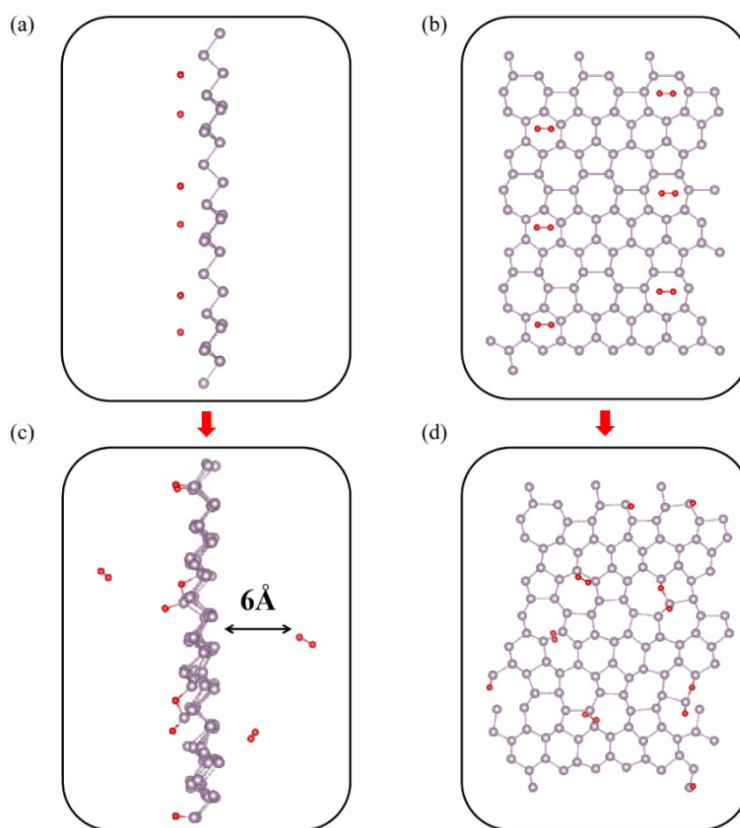

**Figure S3.** Snapshots after 3 ps MD simulations with temperature controlled at 300 K show the interaction of O<sub>2</sub> with the P<sub>567</sub>.

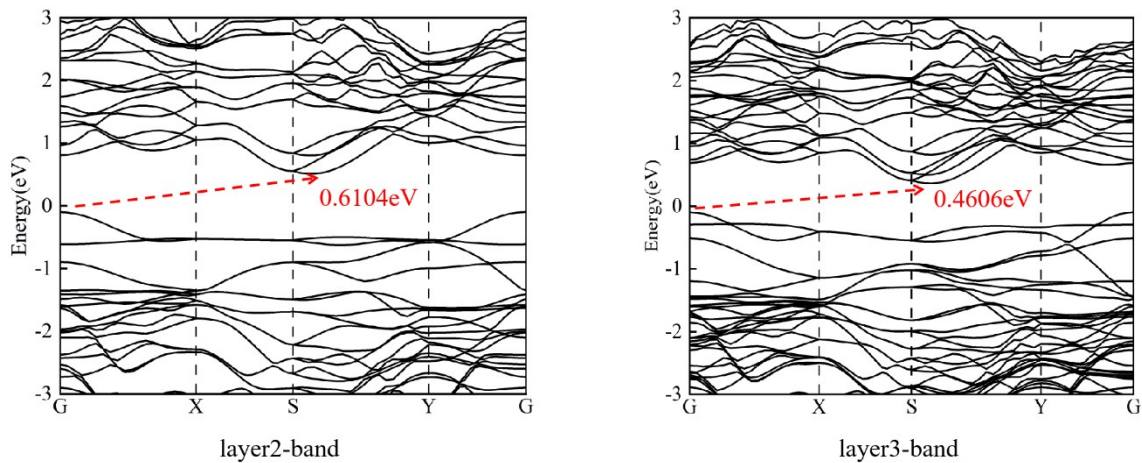

**Figure S4.** Electronic band structures of the P<sub>567</sub> multilayers.

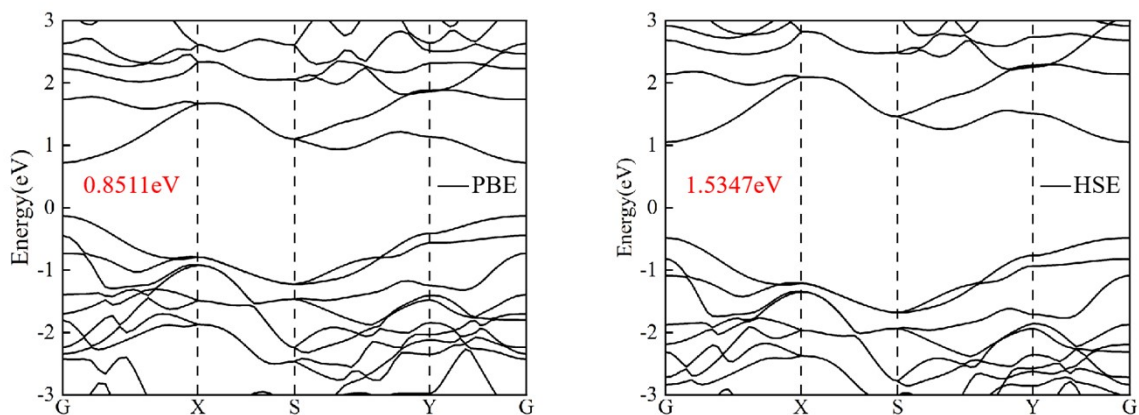

**Figure S5.** Electronic band structures of the P<sub>567</sub> monolayer with 10% compression

## Supporting Table

**Table S1.** Effective mass of the P<sub>567</sub> monolayer and the P<sub>567</sub> multilayers.

| Carrier type | Layer1-m* (m <sub>0</sub> ) | Layer2-m* (m <sub>0</sub> ) | Layer3-m* (m <sub>0</sub> ) |
|--------------|-----------------------------|-----------------------------|-----------------------------|
| electron (a) | 0.457                       | 0.454                       | 0.432                       |
| hole (a)     | 0.527                       | -0.460                      | -0.415                      |
| electron (b) | 0.757                       | 1.285                       | -0.620                      |
| hole (b)     | 1.165                       | -0.464                      | -0.326                      |
